# Supplementary material
Source: publisher figshare collection journal article supplement (https://brill.figshare.com/ndownloader/files/23100947)
Supplement: Supplementary file 1 [file 23100947]

## Sheet: TABLE S1 Gao Ancien
	Concentrations are in %w of oxides or in ppm of elements. <dl is for below the detection limit. nm is for not measured.
	GAO002	GAO003	GAO005	GAO006black	GAO006Blue	GAO006Wh	GAO007a	GAO009	GAO010	GAO013	GAO015	GAO016	GAO018	GAO020	GAO021	GAO022	GAO024		GA001	GA002	GA003	GA004	GA005	GA006	GA007	GA008	GA009	GA010	GA011W	GA011BC	GA012	GA013	GA014	GA015	GA016	GA017	GA018	GA019	GA020	GA021	GA022	GA023	GA024	GA025
	S1 L9	S1 L7	GKM11 L7	GKM11 L7	GKM11 L7	GKM11 L7	GKM11 L7	GKM11 L7	GKM11 L7	GKM11 L7	GKM11 L7	GKM11 L7	GKM11 L7	GKM11 L7	GKM11 L7	GKM11 L7	GKM11 l7		GKM13 L7	GKM13 L7	GKM13 L7	GKM13 L7	GKM13 L7	GKM13 L7	GKM13 L1	GKM13 L1	GKM11 L7	GKM11 L7	GKM11 L7	GKM11 L7	GKM11 L7	GKM11 L5	GKM11 L5	GKM11 L5	GKM11 L5	GKM11 L5	GKM11 L5	GKM11 L5	GKM4 L2	GKM4 L2	GKM4 L4	GKM4 L4	GKM4 L4	GKM4 L4
SiO2	0.702397	0.64583	0.645193	0.691646	0.653634	0.66263	0.538452	0.665626	0.626292	0.651599	0.293575	0.381302	0.458822	0.605612	0.63091	0.690462	0.664285		0.690077	0.62072	0.603076	0.632571	0.471443	0.657957	0.625913	0.624337	0.645985	0.650873	0.644543	0.680116	0.643145	0.610951	0.663281	0.75238	0.673452	0.680196	0.698494	0.627336	0.632043	0.617836	0.599165	0.607478	0.707518	0.661792
Na2O	0.140014	0.149815	0.133167	0.125397	0.137756	0.108255	0.120293	0.140694	0.148952	0.136692	0.0281857	0.0545383	0.0937472	0.166189	0.164574	0.127178	0.149189		0.14834	0.169257	0.157103	0.156485	0.10625	0.138819	0.17003	0.182187	0.142586	0.024121	0.124128	0.133789	0.156996	0.0162519	0.155328	0.077855	0.154286	0.154274	0.129721	0.186676	0.171164	0.144405	0.0177523	0.0187882	0.0956956	0.12555
MgO	0.0275534	0.0362766	0.0276211	0.023541	0.0247446	0.0427987	0.0334484	0.0121061	0.0512817	0.0381678	0.0113895	0.0182117	0.0327548	0.0561249	0.0514725	0.0140398	0.0546529		0.0378763	0.0550367	0.0151943	0.0228723	0.035817	0.0384366	0.0241605	0.0307612	0.0439102	0.000485738	0.0400379	0.041765	0.0534871	0.000518876	0.0391587	0.0174572	0.0410655	0.0395001	0.0181002	0.0312878	0.0458031	0.036742	0.000458495	0.000796143	0.0128525	0.0154387
Al2O3	0.0155022	0.0277209	0.0354273	0.0384811	0.0190935	0.0170565	0.0215309	0.0134307	0.0299352	0.0314026	0.0124015	0.0179015	0.0250666	0.00959237	0.00799313	0.0300789	0.0164402		0.0190129	0.00752425	0.0152555	0.0353521	0.0257064	0.0246731	0.0274004	0.0318399	0.0272214	0.125223	0.0184356	0.0260053	0.00755783	0.132082	0.0199729	0.0153627	0.01272	0.0163604	0.0281629	0.0326839	0.0182585	0.0301552	0.135129	0.130821	0.0272607	0.0297018
P2O5	0.00229245	0.00289294	0.00468977	0.00320253	0.0035478	0.0035636	0.00217266	0.00451911	0.00290537	0.00283431	0.000709673	0.00128116	0.00245147	0.00250187	0.00201374	0.00350055	0.00320019		0.00224333	0.00292005	0.00311125	0.0060418	0.00222914	0.00269045	0.00671135	0.00556055	0.00263633	0.00111307	0.00172155	0.00199199	0.00268325	0.0016644	0.00367843	0.00401749	0.0025377	0.00240151	0.00163366	0.00488038	0.00576231	0.00906854	0.00133376	0.00127558	0.00580695	0.00452886
K2O	0.0228293	0.0252365	0.044596	0.028468	0.0303394	0.0254141	0.0248556	0.0389031	0.0295459	0.026751	0.00749713	0.0132318	0.0198977	0.03035	0.0274884	0.0151071	0.029548		0.00460402	0.00655981	0.00698661	0.00509498	0.00388591	0.00455361	0.00672234	0.00707102	0.00438037	0.00116797	0.00413699	0.00405029	0.00612977	0.00102266	0.00530083	0.00782127	0.00496403	0.00442693	0.00468209	0.0121831	0.00669975	0.00431495	0.000776489	0.000866979	0.00826591	0.00685331
CaO	0.0630496	0.0808625	0.0606117	0.0561857	0.104692	0.0663206	0.0499337	0.0433434	0.0650868	0.0577537	0.0318119	0.0435808	0.0598335	0.0628958	0.0601707	0.0886545	0.0531356		0.0277478	0.0294427	0.019942	0.0440782	0.0210275	0.0305455	0.0333029	0.0204573	0.0292594	0.058356	0.0291404	0.0294184	0.0298512	0.0795891	0.0281347	0.0229939	0.0340649	0.0347471	0.0156544	0.0208562	0.0177476	0.0282763	0.0846168	0.0765671	0.0253673	0.0292897
MnO	0.000357126	0.00126536	0.032413	0.0158977	0.00222401	0.00462301	0.0151853	0.0191721	0.0135124	0.0141716	0.000207383	0.000281343	0.000462372	0.000477494	0.000383948	0.00161764	0.0111093		0.0537379	0.055524	0.0473911	0.0368658	0.0514019	0.0535739	0.0779025	0.0653649	0.0606944	0.130298	0.0556616	0.0577351	0.0494633	0.148599	0.0653497	0.057184	0.0619541	0.0604052	0.0869384	0.0506377	0.0700194	0.0927692	0.153589	0.151437	0.0733261	0.0458707
Fe2O3	0.00558103	0.00761976	0.0100344	0.0109589	0.0192284	0.0079805	0.00668341	0.008597	0.00805649	0.00877734	0.00421325	0.00644008	0.0071203	0.00490563	0.00371701	0.0159233	0.010848		0.000397686	0.000443836	0.0130934	0.00270885	0.00200753	0.0109037	0.00097087	0.000889381	0.00646118	0.00417426	0.0091437	0.00854375	0.000890654	0.00324204	0.000554875	0.00159662	0.000424955	0.000584058	0.000326948	0.000552773	0.000944358	0.000398463	0.00254966	0.00449463	0.0040326	0.00242515
CuO	0.0124746	0.013766	0.000673791	4.51991e-05	0.00196322	0.000200795	0.000979365	0.000569439	0.000295599	0.000501422	0.010348	0.0106144	0.00954302	0.0111508	0.0122342	0.00133375	0.00134494		0.00562805	0.00303647	0.00771912	0.050773	0.0098091	0.0119613	0.00984943	0.0132693	0.0119634	0.00309071	0.00363724	0.0073376	0.00367969	0.00342384	0.00599702	0.00629563	0.00416618	0.00512911	0.0150356	0.0116466	0.0078588	0.0122785	0.00378879	0.00582688	0.0155139	0.00652967
SnO2	0.00032968	0.000327444	1.1501e-05	1.20842e-06	6.22957e-06	0.02834	0.0330987	0.00439143	0.00213277	0.00311166	0.000145195	8.02859e-05	0.0274118	0.0135265	0.00949585	0.000284953	4.2396e-05		0.000223112	0.00856037	0.0120678	0.000117487	0.00411151	0.00232081	0.000105752	0.000582375	0.00243277	1.83518e-05	0.0367735	0.00100901	0.00685439	3.24585e-05	0.000191415	0.00109037	0.00057882	0.000767085	6.58732e-05	4.93158e-06	0.000274556	0.000126638	2.24612e-06	4.28003e-06	0.000498151	0.00894814
PbO	0.000735078	0.00188691	7.1658e-05	2.43126e-05	0.000222378	0.0288387	0.146953	0.0392797	0.0149222	0.022176	0.595562	0.447061	0.256503	0.026411	0.0181734	0.00304244	0.0003639		0.000405944	0.0252954	0.0887408	0.000908094	0.258261	0.0182561	0.00138134	0.00447219	0.0193724	0.000139673	0.0317295	0.00644383	0.02149	0.000267048	0.00041108	0.0206434	0.00126488	0.000247667	0.000112457	0.000152932	0.00168105	0.000436484	8.32688e-05	9.80199e-05	0.0125121	0.0468293
Li	11.4736	13.7416	11.1972	9.32101	45.6592	21.1424	14.2634	38.2228	16.6455	15.0472	7.04577	10.3163	18.213	23.179	17.3418	7.81818	23.0053		11.8425	23.1832	37.3679	36.3231	20.2441	17.2511	80.9229	30.4558	16.7555	26.8715	16.4324	16.6489	28.5934	27.0726	14.6379	12.8101	12.5403	16.0027	11.596	40.0166	44.0716	100.103	25.3696	30.6444	26.3894	54.0278
Be	0.261792	1.01299	1.4112	0.963245	0.988159	1.66005	0.43564	0.677341	0.711094	0.952774	0.407943	0.802691	0.86402	0.557695	0.287789	0.491887	0.75745		0.251113	0.164669	0.298023	1.36821	0.335309	0.612105	0.456937	0.495376	0.38079	3.82756	0.304349	0.466364	0.144313	0.864402	0.307732	0.288935	0.214799	0.299492	0.266345	0.444332	0.361775	0.499621	1.0956	5.54996	0.461654	0.305246
B	112.563	151.964	98.0349	95.9782	138.125	62.2855	105.03	57.208	99.662	123.585	31.7269	53.8649	124.227	115.589	100.194	75.8661	83.5323		132.58	130.032	79.6132	179.403	101.869	111.951	126.011	137.845	128.054	6.21086	91.4977	112.833	111.421	3.80006	124.828	73.7953	131.856	127.095	71.787	143.54	168.344	167.538	3.6576	9.63579	86.9879	87.3002
Sc	1.67902	1.82249	2.05813	2.31091	2.24172	1.38151	1.2419	1.40826	1.88753	1.78973	1.05414	1.59933	1.42888	1.29084	1.08456	2.06814	1.79004		5.86038	4.41767	4.91086	6.92509	3.95828	4.7758	5.38654	5.91627	4.29603	3.48166	3.72525	4.1179	3.6246	3.37582	4.38568	4.58087	3.8929	4.04712	4.01739	5.07219	4.11063	4.92022	3.05383	3.58538	4.44527	3.93198
Ti	502.442	682.849	695.683	667.429	497.289	322.332	481.165	592.505	596.219	528.106	249.015	514.303	415.042	269.118	203.158	727.361	552.633		639.598	174.176	618.461	953.728	474.203	508.694	948.433	1100.06	569.361	146.082	329.089	491.259	202.422	223.291	545.709	690.659	501.999	551.769	477.976	983.866	470.666	1011.58	207.368	212.481	884.282	804.646
V	10.7915	14.6087	25.9175	18.4017	67.1907	13.4439	11.5392	26.7751	17.3128	18.2836	7.87938	11.5182	15.1185	9.24235	6.7303	14.2655	14.5669		12.941	5.7965	13.994	37.7501	15.4839	12.6112	13.7599	16.9821	14.2547	7.62919	8.18635	11.3066	8.00157	12.3686	11.5373	10.4079	8.65076	11.7494	12.0418	12.6955	7.78531	16.879	9.00492	5.90876	14.4302	9.57536
Cr	38.8694	49.9795	104.695	109.046	48.8523	22.7374	24.2411	8.48705	34.5572	37.2054	22.2665	32.3177	32.6814	19.024	16.5854	30.8152	36.9359		54.7586	17.5485	10.9292	15.5985	58.6011	29.8448	15.7261	16.8781	40.5812	3.77749	22.2083	32.6886	18.4401	11.4519	42.2494	10.8619	42.7489	42.4063	25.7937	20.4844	10.0753	18.9204	8.20261	46.169	14.6661	11.4808
Ni	22.0946	30.7171	30.0847	21.085	84.8278	17.6731	16.3291	8.23518	18.2441	28.1316	39.2723	39.5624	30.2399	65.0764	45.1286	61.4641	20.2894		20.36	42.8163	11.0999	27.8511	33.0036	161.182	14.4732	30.7468	64.7499	53.0864	14.5363	82.7627	44.1168	35.609	29.9442	9.2124	20.9904	27.6605	12.9679	16.5753	23.2414	24.5001	31.8128	213.417	13.8298	15.8198
Co	3.66597	3.10345	7.93979	4.86842	606.959	7.40663	5.79106	13.9771	3.91157	45.1131	3.8926	3.18398	4.40602	5.68565	4.00657	295.616	435.238		2.8044	4.71992	7.43542	17.7484	14.7681	550.576	2.99742	4.37718	671.161	218.134	4.53887	274.715	9.84284	254.569	4.308	2.45401	2.03405	291.035	249.743	4.53067	3.58867	3.05515	181.509	357.268	5.60826	5.46923
Zn	41.4162	82.4391	70.8855	32.2064	186.907	41.8304	41.1569	55.7832	49.9931	94.8204	1357.26	1478.05	1071.17	1979.49	2341.55	95.339	293.006		39.0714	2614.5	196.317	59.6404	1183.53	222.527	278.784	377.998	135.191	34.1333	29.6634	80.0219	2493.49	61.354	640.194	120.898	59.5608	45.9618	54.9479	126.278	67.7756	98.7856	28.6301	18.4145	550.603	1647.8
As	42.0254	30.233	7.29642	2.87818	3.01716	25.5417	897.428	4.95597	70.6288	8.47132	265.746	1326.18	363.981	55.5321	47.6315	18.5118	8.02587		29.4701	99.7511	28.6349	7.33812	621.735	70.5435	14.9354	107.352	45.2159	1.29531	72.5836	36.4141	62.8838	1.14589	26.8035	20.7943	25.4734	36.159	3.24068	232.108	17.4767	18.429	0.86896	1.17237	34.3726	51.8395
Rb	10.4146	14.4166	28.9003	17.0037	12.31	18.5754	17.4263	21.2339	20.8586	20.6858	7.74287	11.8857	15.0834	11.105	11.9057	13.3105	14.8969		11.5197	9.47734	8.69722	38.9989	15.7823	19.3059	16.8211	10.7459	18.82	263.687	18.2305	19.5493	13.0718	331.619	11.8621	14.1423	9.37357	13.4117	9.68064	20.589	9.38557	12.1389	377.743	242.569	15.5111	29.2591
Sr	396.322	518.745	332.246	311.119	319.944	328.327	375.452	331.314	518.348	409.011	258.155	311.296	502.443	545.686	555.605	425.472	448.798		419.827	484.677	309.068	465.081	384.749	397.642	526.696	360.827	471.393	213.875	400.127	472.36	401.217	249.011	447.742	431.966	464.495	450.717	483.516	343.283	390.457	539.704	315.525	204.45	513.498	345.62
Zr	89.4809	73.3355	85.5005	75.4237	23.7767	30.4018	57.9347	105.953	63.8141	63.5401	29.7158	49.8866	45.1041	14.9057	9.22085	64.2186	150.209		104.431	7.61979	82.5908	70.2751	43.0884	55.4899	97.4253	53.3752	54.842	15.2541	44.4997	61.2997	10.1133	13.2682	70.2334	62.9392	118.372	110.733	63.7578	53.1452	20.4821	121.728	16.0657	15.2903	87.9202	54.2212
Nb	1.96862	2.39872	3.01492	2.66732	1.98111	1.57577	2.22732	2.49788	2.72434	2.23053	1.15523	2.20045	1.79661	0.835647	0.63198	2.18751	2.29423		2.2954	0.750875	2.79735	3.93626	1.93401	1.96524	4.20953	4.03325	2.22125	3.82148	1.55115	1.98664	0.762749	1.27365	2.08991	3.01872	2.07993	2.13189	1.89102	3.57715	1.7832	4.71174	1.56159	3.54615	4.10029	3.36786
Ag	3.71231	3.64143	0.663256	0.451266	1.08969	4.27357	11.4373	4.79312	2.86244	0.637708	59.1038	82.8103	29.8974	2.68721	3.56508	11.438	0.276415		3.37179	2.86609	1.69949	1.24336	33.2607	1.35843	5.25481	20.3801	1.37499	0.0810901	1.65109	1.15826	3.91673	0.161436	2.64483	4.00186	4.68694	0.488632	0.768958	3.1311	6.88039	4.44669	0.0587185	0.0428747	6.93015	5.16866
In	0.0720935	0.153703	0.275079	0	0.368229	7.98661	2.45764	0.439491	0.345505	0.577597	0.0365491	0.059509	0.965331	2.18178	1.0404	0.478779	1.23957		0.695805	29.8383	42.2571	0.826475	14.3338	9.09197	0.366111	1.68571	8.59328	0.0760677	122.062	3.27571	24.4953	0.122831	0.672553	3.82937	1.8648	2.20836	0.611593	0.102929	0.952401	0.590271	0.0608902	0.0425058	1.6721	30.4063
Sb	53.3383	13.7235	0.721261	0.191052	1.5432	9.41093	6.84938	0.915427	1.03573	1.96773	26.1656	43.3144	416.71	7.94164	9.44597	1450.67	10.5655		25.6632	12.1149	3.32705	2.18702	17.8491	2.0525	14.4196	65.697	3.03461	0.768233	1.86307	2.38138	35.3141	0.208975	9.49151	11.9708	17.6401	4.67036	1.59001	7.03818	48.2868	54.1145	0.217564	0.458087	16.1187	30.0049
Cs	0.163938	0.207204	0.541657	0.253023	0.39665	0.418024	0.268469	0.201638	0.338473	0.325644	0.236885	0.329658	0.368931	0.220472	0.190596	0.205561	0.173592		0.196174	0.281978	0.153117	1.65562	0.457792	0.266633	0.169234	0.198943	0.322064	5.15973	0.307388	0.475688	0.240968	6.35642	0.237812	0.590178	0.223537	0.248101	0.135436	0.25926	0.180828	0.265395	8.23221	7.17705	0.213956	0.234621
Ba	79.1119	153.797	377.23	291.709	69.1263	118.55	295.066	610.198	282.943	283.639	102.394	129.267	161.008	60.9477	47.5881	222.112	212.831		123.288	33.7307	432.768	350.93	141.073	228.375	133.472	124.404	205.078	111.371	193.027	213.185	48.0845	157.961	86.8445	78.6728	54.1425	79.8128	189.385	140.26	66.3503	131.882	165.898	255.671	136.266	227.954
La	5.96351	6.53912	6.78107	6.04519	4.16845	4.10138	5.2466	6.90106	6.10958	5.75951	3.47388	4.79516	5.16061	2.5407	1.90545	6.54327	6.71174		5.87864	1.5738	6.61413	14.5586	4.3802	4.94576	8.88448	10.7349	5.22011	3.05939	3.90631	5.24478	1.99614	3.19076	6.36601	7.25336	5.88121	6.19598	6.57528	10.4102	5.17822	9.71726	2.98663	3.58334	8.80526	8.28084
Ce	11.735	13.0814	15.5754	11.1823	8.30625	9.87376	10.078	13.513	12.9193	12.6456	6.62316	10.2076	10.8364	4.798	3.65078	12.8363	12.8974		11.7187	3.10024	12.576	29.1889	8.47325	10.0905	18.1237	23.9505	10.6658	40.8296	7.60137	10.2096	3.98285	31.4671	12.8643	14.9332	12.0059	12.7201	12.1141	22.8909	9.34182	20.4829	36.5614	23.1939	17.4404	17.3669
Pr	1.39569	1.64126	1.69547	1.48682	1.07064	1.05529	1.67875	1.7147	1.6226	1.63144	0.887364	1.29304	1.43943	0.589918	0.469637	1.66593	1.52313		1.57652	0.439686	1.68684	3.64829	1.13918	1.32925	2.24097	2.81385	1.38064	0.729199	1.01108	1.3726	0.523089	0.818708	1.64915	1.87998	1.50639	1.65434	1.64702	2.73457	1.33663	2.4781	0.62599	1.09627	2.21052	2.11165
Ta	0.145243	0.145135	0.179126	0.178919	0.101361	0.0844086	0.252524	0.188438	0.175651	0.13752	0.147102	0.192699	0.205371	0.0810109	0.0804421	0.157884	0.186937		0.178785	0.0817158	0.214207	0.351462	0.173113	0.153961	0.296677	0.274964	0.170206	1.3635	0.125499	0.151589	0.0898772	0.171707	0.160619	0.241313	0.163507	0.183406	0.136684	0.260892	0.135664	0.350768	0.21568	1.74463	0.295683	0.25619
Au	2.00902	0.593527	7.93964	0.0295977	0.135126	0.0891488	67.8926	0.242067	1.9799	1.54358	0.144487	0.760616	0.976873	0.35737	0.243744	9.62408	0.104456		0.3554	0.103028	0.051201	0.126153	0.10089	0.012304	0.1498	2.31852	0.0153791	0.0144837	0.0114517	0.0109778	0.090177	0.017103	0.12725	0.0436482	0.17671	0.024216	0.00962795	0.00867407	0.0147871	0.025318	0.00952307	0.0119512	0.0688596	0.277533
Y	4.33218	5.97219	6.14474	5.67396	4.458	3.8041	4.22814	4.65169	5.45643	4.84158	2.57643	4.20275	4.29374	2.47451	1.96141	7.52387	5.33936		4.29153	1.56571	5.02996	12.5917	3.91534	4.25838	5.64741	7.30549	4.56476	2.41244	3.61419	4.6454	2.04056	1.83861	4.79189	5.03789	4.45402	4.67246	7.15188	6.33435	4.34335	6.36165	1.61221	2.42475	5.78153	4.64247
Bi	0.307326	1.13734	0.177991	0.057956	0.0816909	1.42189	0.807348	0.399947	0.157341	0.25186	1.06532	1.46872	2.64839	0.920691	0.903421	3.31883	0.455467		0.302281	0.882595	1.63461	0.745051	1.59071	0.207671	0.846765	1.17375	0.195575	0.0290435	0.394745	0.0775952	0.967149	0.0754141	0.693308	1.02717	0.60771	0.144165	0.0213226	0.601002	0.8694	1.00872	0.0324093	0.0764618	1.8043	2.93406
U	0.667456	0.709423	0.850456	0.689583	1.33701	0.954082	0.695801	0.90907	0.796376	0.840895	0.555912	0.751133	0.751553	0.460727	0.280613	0.847667	0.654348		0.718826	0.331564	0.696637	4.23225	0.685135	0.95467	0.745053	1.02838	0.575479	0.821013	0.61753	0.575477	0.210819	0.774978	0.633576	1.14937	0.566281	0.779112	0.764993	0.61095	0.507075	0.930571	0.718931	0.636384	0.644829	0.621281
W	0.143491	0.203452	2.60916	2.50816	0.180211	0.404256	2.57601	0.248776	1.05941	0.758051	0.113587	0.138821	0.129754	0.16885	0.155101	0.310469	0.389454		0.106072	0.154298	0.485987	0.418586	0.387661	1.50888	0.281099	0.111359	1.02525	0.287112	1.15308	1.29685	0.140483	0.190979	0.0727757	0.316077	0.078306	0.16473	0.149649	0.227243	0.221696	0.110567	0.167161	0.398887	0.489265	0.355698
Mo	0.49328	0.666474	1.67842	0.981777	16.0488	1.56959	1.50606	2.55651	1.76529	1.75619	0.245889	0.307591	0.452887	0.501276	0.428224	2.20802	3.6997		0.671434	0.4983	0.920726	1.5376	0.948578	2.53642	0.41264	0.146979	2.78243	0.95228	1.5143	2.21475	0.586177	2.03668	0.589597	0.65124	0.797333	0.820982	1.8328	1.14997	0.298447	0.513399	1.33631	0.186757	0.615193	0.414216
Nd	4.93907	5.77267	5.54783	5.13212	3.42994	4.22028	4.90169	5.90714	5.81089	7.62638	3.22469	4.92526	5.38678	2.15327	1.83201	6.63965	5.59055		4.46826	1.29913	5.38454	11.5634	3.56957	4.01647	6.95221	8.5475	4.38968	2.02967	3.25066	4.18415	1.6936	2.40181	5.09933	5.68338	4.53434	4.99419	5.58869	8.36783	4.20669	7.62656	1.73927	3.30417	6.68356	6.58525
Sm	1.0529	0.939643	1.1105	0.901878	0.660066	0.900703	1.10015	1.23248	1.25013	0.976747	0.689446	0.95992	0.914024	0.511846	0.404274	1.37036	1.08815		0.883874	0.27968	1.08471	2.57163	0.767944	0.8305	1.299	1.67308	0.874333	0.531172	0.674337	0.911031	0.370741	0.531342	1.03092	1.11805	0.919797	0.980963	1.21836	1.61837	0.837121	1.52939	0.345511	0.792788	1.32487	1.2591
Eu	0.226228	0.246249	0.274515	0.254204	0.142145	0.159012	0.325948	0.220383	0.330511	0.228265	0.184728	0.281477	0.247708	0.109925	0.0973768	0.413154	0.21208		0.237708	0.101988	0.252029	0.63749	0.205412	0.217086	0.27037	0.384391	0.227514	0.135681	0.158419	0.225807	0.0925121	0.138366	0.228469	0.263955	0.197046	0.204889	0.304662	0.365147	0.191968	0.327317	0.110384	0.295226	0.288878	0.269467
Gd	0.78812	0.936133	0.747631	0.713068	0.477559	0.908262	0.847269	0.87308	1.02952	0.704752	0.649455	0.911553	0.971996	0.438458	0.398533	1.28217	1.0864		0.73795	0.292277	0.963611	2.29419	0.673549	0.696067	1.06808	1.34063	0.756413	0.459595	0.602531	0.760653	0.36806	0.417775	0.873995	0.938366	0.762346	0.826479	1.06911	1.35492	0.779403	1.22502	0.305199	0.575701	1.0926	0.983088
Tb	0.11494	0.144499	0.133598	0.132535	0.100901	0.107995	0.138056	0.136773	0.143111	0.117327	0.111507	0.140473	0.253249	0.0700959	0.0576875	0.193367	0.131758		0.154312	0.0841979	0.17141	0.386403	0.122483	0.135416	0.19139	0.247519	0.15881	0.101283	0.112612	0.139545	0.0715985	0.0848625	0.159725	0.182346	0.149483	0.148707	0.190857	0.226411	0.130489	0.227206	0.0670073	0.143888	0.195044	0.161272
Dy	0.696685	0.965091	1.03457	0.895221	0.619887	0.56485	0.835787	0.810291	0.929629	0.766711	0.68391	0.973296	0.819659	0.40333	0.379627	1.24629	0.91699		0.686865	0.262634	0.890424	1.96912	0.641254	0.70618	0.970863	1.2264	0.737795	0.528526	0.578955	0.724229	0.311043	0.413608	0.782439	0.823706	0.716296	0.758519	1.04012	1.11211	0.743002	1.09868	0.341468	0.556732	0.944126	0.819694
Ho	0.143666	0.203945	0.19644	0.1737	0.150934	0.137742	0.149692	0.174987	0.176462	0.153862	0.134164	0.223827	0.151599	0.0974884	0.0697535	0.23507	0.176338		0.180797	0.0682231	0.203655	0.451258	0.166429	0.177588	0.224671	0.283377	0.203041	0.149763	0.1353	0.17987	0.0840111	0.0935485	0.213633	0.237564	0.181168	0.189767	0.256559	0.260879	0.170866	0.267887	0.0799966	0.135483	0.237654	0.197788
Er	0.398711	0.55224	0.633231	0.511986	0.377008	0.340685	0.645312	0.510229	0.567617	0.497678	0.470789	0.599788	0.556896	0.25137	0.211371	0.634181	0.449542		0.419889	0.144199	0.471493	1.08666	0.387503	0.413945	0.534032	0.652593	0.47322	0.304825	0.346317	0.43744	0.183519	0.227373	0.46073	0.467838	0.442978	0.473934	0.634314	0.592872	0.410028	0.612298	0.174739	0.265092	0.5258	0.45774
Tm	0.0500607	0.0940323	0.085843	0.0568177	0.0454401	0.052303	0.058711	0.0723031	0.0755399	0.0684572	0.0599028	0.0853544	0.067159	0.025837	0.0232006	0.0787566	0.062247		0.137796	0.0361327	0.0810523	0.175992	0.0714262	0.0831076	0.0957554	0.14205	0.102917	0.0747826	0.0651737	0.0806593	0.0325371	0.0441331	0.0842872	0.082897	0.0950002	0.083602	0.102179	0.100111	0.0686965	0.108832	0.0430799	0.0574617	0.0920553	0.0752833
Yb	0.484832	0.516104	0.624167	0.554761	0.324226	0.335855	0.511855	0.622322	0.618447	0.445369	0.323235	0.679976	0.537215	0.237993	0.247988	0.605794	0.521739		0.461484	0.149609	0.438881	0.952961	0.390843	0.423724	0.572284	0.64545	0.477114	0.417296	0.351872	0.460291	0.170567	0.283724	0.477914	0.462491	0.462357	0.48555	0.574907	0.541564	0.409342	0.646551	0.236748	0.289017	0.546354	0.429738
Lu	0.0632631	0.109162	0.0928662	0.0755107	0.0505272	0.0475508	0.0908186	0.073304	0.100736	0.0753898	0.0539364	0.0882725	0.0802778	0.0423886	0.0381281	0.0947303	0.087205		0.104333	0.0355246	0.0816894	0.167815	0.0722743	0.0800096	0.0992035	0.10936	0.081788	0.0824468	0.064256	0.0828665	0.0351921	0.0522366	0.0858085	0.0986478	0.0948436	0.0957824	0.103686	0.103066	0.0667339	0.133142	0.0481587	0.0517484	0.0901872	0.0851593
Hf	2.43866	1.93501	2.17225	1.93386	0.544451	0.907024	1.74967	2.94717	1.93523	1.66941	1.36916	1.96638	1.77444	0.446322	0.23201	1.56381	4.04192		2.53575	0.222364	2.05696	1.88205	1.17313	1.50621	2.5176	1.418	1.4308	0.529658	1.20181	1.65509	0.259699	0.39751	1.87774	1.64345	2.96667	2.84437	1.61477	1.48326	0.587526	3.12975	0.475378	0.506626	2.29885	1.50574
Th	1.57465	1.7254	1.72094	1.70428	1.04587	0.956087	1.30672	1.68891	1.68163	1.36298	1.23012	1.60977	1.6186	0.68948	0.448416	1.1545	1.95284		1.56575	0.326604	1.54004	4.80372	1.21335	1.19727	2.3072	2.61823	1.28076	0.580396	1.03193	1.25543	0.393054	0.520631	1.5014	1.78303	1.68367	1.68905	1.16533	2.47726	1.37037	2.45707	0.472347	0.733294	2.30092	2.16529

## Sheet: TABLE S2 Gao Saney
	Concentrations are in %w of oxides or in ppm of elements. <dl is for below the detection limit. nm is for not measured.
	GS0016a	GSO026a	GSO031	GSO032a	GSO033	GSO034	GSO035a	GSO036Co	GSO036G	GSO036R	GSO036W	GSO036Y	GSO037	GSO038	GSO039	GS0045	GSO049Co	GSO049W	GSO052	GS0055	GS0056	GS0057	GS0058	GS0059	GS0061	GS0063	GS0064	GS0065	GS0067	GS0068	GS0069	GS0070	GS0071	GS0072	GS0075BC	GS0075W	GS0077	GS0078	GS0080	GS0081	GS0082	GS0085	GS0086	GS0087	GS0088	GS0090	GS0096	GS0102	GS0104
	GS1 L14	GS1 L14	GS1 L10	GS1 L10	GS1 L10	GS1 L10	GS1 L10	GS1 L10	GS1 L10	GS1 L10	GS1 L10	GS1 L10	GS1 L10	GS1 L10	GS1 L10	GS1 L14	GS3 L.13	GS3 L.13	GS3 L.14	ACGS L1	ACGS L1	ACGS L1	ACGS L1	ACGS L1	ACGS L3	ACGS L10	ACGS L10	ACGS L10	ACGS L13	ACGS L14	ACGS L15	ACGS L16	ACGS L17	ACGS L17	ACGS L.18	ACGS L.18	ACGS L19	ACGS L19	ACGS L20	ACGS L26	ACGS L26	ACGS L28	ACGS L28	ACGS L28	ACGS L28	ACGS L28	ACGS L33	ACGS L33	ACGS F11
SiO2	0.694885	0.651263	0.652954	0.552032	0.600163	0.618144	0.66824	0.659901	0.647466	0.631563	0.631433	0.527936	0.618626	0.669961	0.690745	0.681743	0.711844	0.628635	0.673334	0.66443	0.610254	0.719416	0.632511	0.674321	0.545818	0.711548	0.688917	0.0586433	0.709493	0.499453	0.656768	0.689852	0.670339	0.672785	0.665214	0.660664	0.564492	0.619662	0.67069	0.535655	0.67393	0.678326	0.6493	0.684335	0.371968	0.611284	0.766105	0.725737	0.743627
Na2O	0.130026	0.140763	0.160418	0.121091	0.134149	0.147226	0.144586	0.137645	0.129186	0.140657	0.141595	0.118093	0.138069	0.142679	0.116244	0.129155	0.137292	0.0998623	0.146096	0.140118	0.16815	0.12479	0.145989	0.15667	0.097548	0.113961	0.13551	0	0.124196	0.0875616	0.13156	0.141335	0.145806	0.149009	0.150078	0.15836	0.119961	0.132963	0.149847	0.116814	0.137579	0.146883	0.152985	0.14571	0.0795738	0.145413	0.0861367	0.142494	0.106649
MgO	0.0143269	0.0403088	0.0440437	0.0305804	0.0308098	0.0363897	0.0467479	0.0408458	0.0388997	0.0400459	0.0452209	0.0378748	0.0350318	0.0600698	0.0372697	0.033441	0.0336339	0.0316321	0.0448071	0.0430206	0.0654387	0.00797646	0.0499934	0.028715	0.0322023	0.024825	0.0353676	0.000113466	0.0534695	0.0397001	0.0383231	0.0253787	0.0559307	0.05725	0.054659	0.0564122	0.0362198	0.03156	0.0565282	0.0293404	0.0361478	0.0403353	0.0393541	0.0398651	0.0234764	0.0423493	0.030832	0.0219662	0.0268243
Al2O3	0.0291628	0.022218	0.0190839	0.0139401	0.0193671	0.0281403	0.0268772	0.0227558	0.0173932	0.0223084	0.0194867	0.0158587	0.0239049	0.0124881	0.0164962	0.0277376	0.015062	0.0272881	0.0273772	0.0274118	0.00872096	0.0244728	0.0223584	0.023098	0.0199488	0.0232354	0.0280172	0.000567259	0.0115128	0.0105901	0.0162598	0.0153241	0.014694	0.0143467	0.0155762	0.0133686	0.0214645	0.0459661	0.014181	0.0127663	0.0198331	0.0150683	0.0185201	0.0111268	0.0121849	0.0184968	0.0228695	0.0208892	0.0214746
P2O5	0.00214106	0.00398741	0.00275965	0.00258821	0.00335819	0.00302239	0.00161862	0.00263831	0.0019502	0.00251841	0.00223259	0.00157357	0.00387224	0.00163585	0.00259377	0.0044946	0.00265286	0.00427176	0.00198612	0.00227822	0.00137421	0.00146954	0.00211478	0.00205885	0.00301599	0.00193561	0.00251733	0.000174333	0.00030318	0.00153813	0.00253561	0.00247964	0.0012883	0.00130598	0.00149061	0.00110723	0.00453079	0.00687996	0.00121512	0.00101825	0.00301758	0.00247933	0.00258549	0.00205817	0.00175089	0.00209786	0.00156731	0.00332056	0.00221154
K2O	0.0137382	0.0353933	0.0301675	0.0307684	0.0310334	0.0258362	0.0310752	0.0263474	0.0285384	0.0257098	0.0282439	0.0229242	0.0282016	0.0344234	0.0280312	0.0247925	0.0288347	0.0244589	0.0297171	0.0278856	0.0273511	0.00843863	0.0268276	0.0268166	0.0317637	0.0206476	0.0231704	0.000494715	0.0247521	0.0191441	0.0373303	0.0217492	0.0262409	0.0365008	0.033788	0.0314376	0.0313316	0.061513	0.0271405	0.0339454	0.0266674	0.0338309	0.0363	0.0378859	0.0216719	0.0316024	0.0277332	0.023544	0.0254074
CaO	0.0909336	0.0780817	0.076711	0.0672413	0.0820744	0.0807593	0.0567632	0.0728709	0.0648791	0.0755694	0.0714221	0.0592392	0.0727512	0.0582415	0.0653238	0.0759106	0.0558568	0.0735346	0.0589788	0.0507839	0.0572741	0.0664668	0.0554035	0.0759056	0.0646363	0.0527272	0.0726889	0.00176809	0.0548915	0.043055	0.0636927	0.0590007	0.0497711	0.049255	0.0530229	0.0455259	0.0664306	0.0554099	0.0515816	0.0497167	0.0639299	0.0623687	0.0797752	0.0535069	0.0465185	0.0572696	0.0362906	0.048674	0.0456915
MnO	0.00152417	0.00275995	0.00037923	0.00399902	0.0023414	0.000426102	0.00347706	0.0090517	0.00207356	0.00931329	0.00715983	0.0059465	0.00948534	0.00526278	0.000759551	0.000469061	0.00104703	0.00777439	0.00245096	0.00597435	0.000431106	0.00543085	0.0028164	0.00197202	0.00820211	0.0104117	0.000750947	3.34537e-05	0.00415316	0.00897628	0.00265623	0.000310873	0.0137437	0.0116897	0.0120136	0.0138818	0.00796648	0.00330769	0.011747	0.00366069	0.000391424	0.00038998	0.000475209	0.000340069	0.00764645	0.000776722	0.000245519	0.000275422	0.00029468
Fe2O3	0.0145425	0.0136207	0.00682364	0.0062508	0.00764455	0.00841907	0.0127643	0.0163728	0.00941924	0.0249162	0.00824366	0.00636262	0.00864219	0.00315413	0.00749974	0.00853752	0.00550231	0.00918727	0.00835344	0.0111132	0.00476924	0.0119229	0.00822124	0.00690964	0.00944171	0.0256561	0.00395136	0.000443376	0.00332369	0.0017671	0.00657337	0.00525524	0.0127471	0.00429714	0.0116454	0.00406973	0.0100631	0.0353614	0.00858977	0.00669939	0.00602018	0.00487954	0.0119155	0.00362618	0.00682918	0.00659049	0.00654763	0.00406189	0.00643425
CuO	0.00140955	0.00149401	8.73179e-05	0.000231367	0.00777216	0.00921515	0.00219847	0.00160698	0.0274627	0.0195722	0.000375849	0.000571374	0.000191991	0.000210815	0.0114347	0.0102062	0.000568299	0.000252286	0.000527788	0.00257005	0.0181152	0.00268431	0.0158815	0.000826233	0.000303433	0.00588332	0.00223268	0.0014783	0.000142732	0.000186621	0.00888276	0.0154786	0.001344	0.000100557	0.0011565	4.90469e-05	0.000899546	0.00627641	0.00144846	0.000251949	0.0188797	0.0143148	0.000455176	0.0132016	0.000474219	0.00857174	0.0119399	0.00282854	0.0120877
SnO2	0.000215077	3.73114e-05	3.31784e-06	0.0170276	0.00947943	0.00524375	8.66167e-06	4.74573e-05	0.00701442	0.000722273	0.0352844	0.0239822	0.00744935	0.00265805	0.00701175	0.000267832	0.000877146	0.055182	3.27815e-05	0.00192512	0.00974538	0.000594954	0.00282584	0.000569548	0.041352	6.58975e-06	2.63897e-05	0.00561001	0.00519388	0.0265061	0.00247886	0.0115723	0.000356501	0.00216709	4.23169e-05	0.0142552	0.0312936	0.000162579	0.000764807	0.0187837	0.00207446	0.000604396	1.81335e-05	0.000642944	0.0467704	0.00863219	0.00126092	0.000255089	0.000175471
PbO	0.00237982	0.000662291	6.03671e-05	0.149302	0.0661425	0.0292381	0.00023451	0.00053538	0.0204139	0.00196533	0.00410868	0.175335	0.0488627	0.00531999	0.0102546	0.000474671	0.00119655	0.0324765	0.000261184	0.0161989	0.0254792	0.00838384	0.0249652	0.00184064	0.145478	0.00122333	0.000202415	0.930192	0.0084178	0.258034	0.026877	0.00546399	0.00245168	0.00107751	0.000177446	0.000644951	0.104948	0.000548699	0.000960193	0.191087	0.0044218	0.000378812	0.00060858	0.00163567	0.377623	0.0604815	0.00348248	0.000346805	0.000673009
Li	7.73938	14.0049	20.0394	10.7716	9.26531	15.5403	15.0417	17.7895	15.462	16.6818	19.0107	15.1337	13.691	25.8767	15.1475	12.6449	16.0056	10.6032	14.7356	18.8342	19.1239	6.88624	17.2853	8.26131	11.8807	24.4053	14.4341	0.103498	19.7618	15.2008	12.2864	15.3997	26.518	21.5146	21.5812	24.5043	13.748	31.2915	26.6299	4.04818	12.2071	16.6553	14.9427	11.362	8.20299	17.0874	7.68251	5.99739	8.14988
Be	1.26301	0.517286	0.982834	0.792643	1.11405	0.305248	0.611718	1.23889	0.896242	1.16871	0.889693	0.7489	1.37947	1.40844	0.509586	0.837974	0.708019	0.735896	0.825193	1.76314	0.467086	0.450367	1.25254	0.60585	0.508397	2.08397	0.413298	0	0.948283	0.371845	1.88437	1.49383	0.777417	0.972254	0.504174	0.51015	0.992054	0.913319	1.48198	0.680314	1.39376	0.659328	1.54307	1.33063	0.820832	1.2098	1.44139	0.466086	0.618082
B	78.4616	101.28	111.515	76.3419	85.0388	144.832	115.65	113.349	97.5945	105.773	103.007	83.0166	122.431	87.7934	83.3033	129.427	108.949	108.225	116.509	102.736	97.1144	163.67	111.841	100.135	98.4251	113.226	146.501	1.18089	68.6059	72.1324	100.309	117.313	84.1975	77.1256	83.4734	81.7477	115.485	185.226	81.4852	52.4676	139.748	110.681	115.566	127.366	60.1117	104.646	124.584	77.7953	83.7412
Sc	2.76575	2.26225	1.77452	1.63484	1.94	2.24019	1.5501	2.25681	1.86217	2.25833	2.16086	1.69836	2.03608	1.26389	1.92892	3.46615	1.65497	2.40857	1.41015	3.52668	1.61191	3.16554	3.9107	3.56319	4.21918	5.0129	2.46615	0.360132	1.10834	1.44769	3.73107	3.60724	3.57624	3.82181	4.2035	3.4704	4.24041	6.52088	3.25543	1.59636	3.54175	4.38369	4.27584	3.45551	2.92135	3.65847	4.57935	2.34953	3.3423
Ti	679.099	672.19	506.412	416.799	500.654	744.466	624.28	601.571	560.313	598.435	578.593	473.922	611.293	325.872	681.839	878.953	451.885	1329.22	416.479	214.354	95.0114	496.997	156.46	327.531	450.938	302.264	448.498	15.6517	111.059	184.104	217.881	196.224	172.486	377.838	386.259	353.645	424.344	788.677	142.403	133.416	231.017	316.786	777.731	158.756	206.165	300.09	287.567	320.089	233.231
V	14.6197	17.7931	12.661	12.7146	14.1662	16.4696	12.7854	17.2309	14.4775	17.4146	16.3495	13.447	18.574	9.55058	15.1027	14.541	9.33865	19.5824	11.7075	13.8823	7.5445	19.576	10.4714	12.0641	22.7323	20.7713	12.9735	0.684808	9.55912	11.6358	15.2462	11.1861	20.4103	16.1665	13.286	12.318	20.586	27.741	19.8207	9.8055	12.2569	9.95	16.2158	7.1166	15.1061	15.342	9.23297	11.6583	10.6293
Cr	31.516	40.1406	41.3374	26.2107	39.5969	45.5976	38.8789	59.8131	46.8312	62.2697	54.8709	42.8449	63.3642	23.7271	46.8923	68.4134	23.7609	37.6135	31.923	32.5801	19.3907	15.4675	30.1999	34.057	63.9282	64.6436	63.6513	0.511715	16.4253	23.4723	50.3409	39.9733	34.9243	29.4614	34.7511	31.7469	55.2394	21.1696	30.648	24.4008	44.4223	34.1101	63.3367	32.1015	37.1766	56.212	51.5841	43.1777	27.057
Ni	60.9389	32.6727	16.8906	19.0953	23.4291	26.5167	206.262	25.2143	29.0994	34.5306	21.9155	19.8549	23.0158	11.7834	17.6985	31.8337	28.3899	23.6138	19.7854	95.8455	65.58	33.321	68.5814	46.8078	25.3166	300.317	20.9838	3.65737	6.31377	16.0858	22.1949	24.6933	19.5001	13.7862	21.6239	13.7183	26.9233	25.9312	14.4786	11.354	37.9265	20.1969	19.9463	15.5565	20.4771	18.8571	18.9923	11.4197	18.3321
Co	319.045	819.492	2.10994	3.72938	16.2382	3.04613	534.905	800.067	146.337	55.7339	77.1409	6.27387	4.73034	3.82651	201.895	4.17778	250.955	11.9402	138.161	462.611	6.68122	612.616	11.9603	149.462	5.99018	1177.75	2.67641	0.458379	3.08598	5.64705	20.6518	1.99246	656.548	6.0771	783.312	7.18908	7.34681	18.3668	251.531	5.35778	3.00594	2.42866	588.369	1.57386	10.0535	31.2735	1.92694	2.10366	2.21069
Zn	81.0626	1920.75	27.5095	40.9726	82.2776	43.4192	79.2717	3974.33	749.684	467.993	403.247	52.177	44.1732	27.1847	758.463	86.7484	34.0817	43.9617	104.406	147.591	2343.94	87.1354	2258.64	31.3456	66.2866	457.898	49.5087	79.4938	24.6974	39.8748	67.3783	29.476	166.835	25.106	761.614	21.2589	120.684	151.064	232.325	92.9857	70.4029	33.3327	670.156	26.8743	52.1256	95.7072	49.2141	40.4665	30.2301
As	6.24883	3.55777	6.73978	189.999	32.1414	29.4139	9.60724	35.5283	152.356	79.4807	4.95558	179.207	1.9511	3.44049	41.2206	30.1726	24.6828	16.741	7.56718	7.15947	27.5856	6.72408	72.4537	0	20.7249	11.5398	0	59.1705	0	43.9356	42.4116	48.8105	4.4517	0	0	0	3.7795	4.19926	3.27444	38.753	61.0759	48.6611	17.1346	21.6524	172.178	60.4097	22.3074	0	40.9292
Rb	10.9151	13.7068	12.6234	12.7459	13.4058	13.9731	21.5436	11.117	12.1077	11.1016	12.8147	10.6006	14.5649	21.4296	13.5849	18.0811	12.399	19.3476	19.6864	21.3661	10.5765	12.461	16.0168	9.20843	26.4392	10.9032	16.6997	1.58882	14.5896	10.7301	12.5505	11.9795	12.9901	15.1006	12.3895	11.7482	18.3331	59.9356	13.5421	20.6708	9.42119	12.5478	12.8354	8.84321	14.5702	14.7116	16.5259	17.2591	13.9099
Sr	432.469	458.685	505.73	435.75	441.667	549.182	410.67	444.678	416.831	440.167	482.568	405.548	452.46	440.252	472.935	468.301	357.535	388.649	427.316	425.829	501.129	375.242	483.948	382.518	490.686	335.349	472.634	19.466	381.802	372.916	533.552	343.33	419.809	370.532	426.701	422.087	542.97	665.744	417.077	288.419	468.268	474.231	642.805	370.599	441.02	559.623	262.787	260.326	275.365
Zr	66.5843	68.9488	88.2713	54.0183	70.1988	93.5276	75.0861	102.122	94.9648	91.7848	98.3832	84.7569	86.531	87.8347	139.628	110.082	129.182	86.1667	50.0704	47.0655	11.0831	65.8447	35.1466	57.049	116.146	91.177	66.3773	6.4035	62.9701	80.5821	79.5657	75.0979	86.0388	139.628	201.501	218.879	103.455	87.8858	75.6138	31.2444	77.4372	99.6978	248.497	88.5799	100.829	171.727	122.348	74.6077	84.1861
Nb	2.46025	2.5265	1.8714	1.81456	1.98935	2.57465	2.57128	1.97396	2.3981	2.04029	2.17446	2.09746	2.12303	1.34373	2.36778	3.18	2.02059	4.94964	1.60998	2.16044	0.951504	2.57897	1.60526	1.62256	3.12785	2.87689	2.60008	0.305857	1.39346	1.52734	2.43796	1.63321	1.8359	2.1134	2.57987	2.55641	2.96492	5.38422	1.5966	1.41655	2.06461	2.13144	3.00732	1.53905	2.24231	2.70538	2.54041	1.89598	1.97719
Ag	0.575626	0.292063	0.017317	6.27573	2.75102	5.24059	0.573781	0.690959	9.48744	4.13281	0.706439	3.91522	5.00874	0.740779	3.41389	5.75887	5.67169	1.71181	0.255452	12.5668	6.42116	1.5439	3.64409	0.742443	20.6022	0.611693	3.77498	6.36764	0.275662	6.36208	5.54871	3.7545	0.340315	0.078855	0.538035	0.234372	15.2865	8.67262	0.37445	6.96777	4.0301	7.73104	0.210966	3.86813	2.82506	4.6446	4.78309	3.70078	7.18199
In	0.729727	0.52353	0.0192653	1.02038	1.63245	0.472288	0.321327	1.56068	0.802654	0.30097	8.88978	2.51008	1.67175	0.395907	0.921893	0.273642	0.6076	5.77936	0.257399	0.526567	1.08764	0.274045	0.097871	0.242453	<dl	1.08077	0.0127966	<dl	0.205582	7.38031	0.0824556	0.260487	0.259372	0.469022	1.37382	0.994559	0.38784	0.0779442	0.236875	2.49943	0.0484471	0.139319	0.567018	0.211248	<dl	<dl	0.250993	0.625296	0.0816866
Sb	1606.66	2.79718	0.452285	18.5242	13.2239	15.1953	4.318	1.78459	43.8297	13.6431	1.99483	207.836	14.9433	1.92684	16.0026	14.1454	100.499	117.652	34.6573	2.33226	9.21982	7022.7	6.35901	70.0604	30.5522	0.865914	1.15359	118.589	2.86613	8.71828	6.35421	63.9582	0.794386	0.816509	10.279	1.38975	15.036	5.8986	2.42052	13.8965	45.0185	27.7624	1.30371	16.1586	37.128	87.9233	19.5062	0.845997	23.9159
Cs	0.184807	0.318298	0.226497	0.29439	0.297051	0.229821	0.355033	0.190209	0.243471	0.184739	0.219178	0.198129	0.290257	0.430856	0.219673	0.297202	0.174263	0.249812	0.256456	0.288554	0.179658	0.213143	0.309697	0.106551	0.463202	0.263814	0.204119	0.0743483	0.143877	0.171236	0.182918	0.174031	0.156954	0.163301	0.161306	0.122973	0.339959	1.54731	0.159411	0.236802	0.101203	0.144744	0.232838	0.12083	0.275571	0.246259	0.126217	0.20555	0.180606
Ba	218.615	154.102	84.3588	137.403	127.478	144.149	192.428	184.94	119.619	201.001	161.94	162.17	246.2	112.5	97.0078	108.834	73.809	148.428	178.7	176.383	43.6561	203.033	131.192	173.127	172.636	695.879	133.632	26.4084	98.9974	266.147	89.9865	59.6676	203.616	187.71	176.427	201.17	235.139	198.668	191.301	106.247	86.3488	66.1826	115.59	39.9628	127.101	98.6699	67.4631	92.5086	87.0172
La	7.04966	6.72231	6.5775	6.75451	6.7164	6.92146	5.29043	6.45603	6.93433	6.80192	6.77924	6.42927	6.46999	5.69012	7.52555	7.23005	6.39219	7.02923	4.94892	4.89032	2.45741	6.08245	3.53606	5.70606	7.80878	8.98377	5.69342	1.0365	4.56916	6.40956	6.64612	5.4844	5.29223	6.50633	6.48832	6.75583	8.53467	15.2625	5.1184	5.82711	5.24114	4.80631	7.20254	4.54424	5.65296	6.1789	5.07025	5.36109	5.88305
Ce	13.8483	14.1662	13.2123	13.6882	13.8836	13.0935	10.6233	12.5893	13.7757	13.1257	13.3802	12.8977	13.8266	11.6261	14.619	15.5186	12.7718	15.3097	9.76808	10.6152	4.44935	11.5249	6.98499	10.7106	17.4015	18.0676	11.5564	2.16341	8.76466	13.4858	13.8413	11.3268	10.7206	13.6508	12.4622	12.8873	18.0324	30.909	9.86713	12.1738	10.3703	9.63799	13.5576	9.64458	11.9343	12.262	9.7147	11.6063	10.8531
Pr	1.78761	1.61153	1.55526	1.76758	1.68356	1.68287	1.35603	1.50832	1.74786	1.64494	1.57098	1.62281	1.7699	1.3697	1.74456	1.79768	1.5482	1.8879	1.19846	1.27725	0.626941	1.4764	0.954335	1.47011	1.94361	2.23306	1.47466	0.230491	1.11263	1.62839	1.5443	1.30396	1.25064	1.53984	1.51685	1.67228	2.02542	3.5179	1.17041	1.4626	1.2885	1.0744	1.87175	1.0825	1.34651	1.50757	1.3676	1.37887	1.38213
Ta	0.145323	0.156928	0.108734	0.147229	0.16498	0.183972	0.151752	0.139144	0.146606	0.14331	0.106397	0.573253	0.15401	0.0796501	0.179678	0.212836	0.143855	0.402869	0.13632	0.172374	0.0712959	0.132888	0.114017	0.161101	0.28571	0.22366	0.174536	0.0259878	0.121667	0.16019	0.169364	0.140835	0.116439	0.206437	0.143858	0.189837	0.220186	0.413188	0.158434	0.133358	0.144454	0.0943273	0.249116	0.118349	0.164876	0.165562	0.165374	0.151312	0.158195
Au	0.763095	9.85062	105.345	2.05326	3.07793	331.561	0.215104	2.31179	0.185401	0.038825	0.150758	3.60496	9.7448	1.90001	0.169221	0.395725	257.157	157.336	2.43169	0.143894	0.174124	0.455141	0.193963	1.99226	0.201754	4.39759	0.233769	0.0359412	0.0381261	0.103526	0.209164	0.628391	0.203673	0.140218	0.182475	0.172099	0.142638	0.256448	0.102982	0.137593	0.389465	0.270787	0.125994	0.274463	0.726199	0.652356	0.220812	0.102512	0.409112
Y	7.50889	4.95022	4.5905	3.80632	4.51456	5.63307	5.40795	5.21759	4.46088	5.09429	4.76531	4.12288	5.18268	4.15973	4.76696	5.51555	5.07503	5.37661	4.41814	4.03344	2.3973	6.28135	3.26877	4.96879	5.34517	5.51387	5.55917	0.589402	3.66519	4.32012	4.11477	3.44849	4.14417	4.09839	5.62856	5.63196	6.85644	13.8881	4.18522	2.95073	4.38425	4.44388	6.16561	3.30929	4.31298	5.10781	4.51074	4.0151	4.51021
Bi	2.90976	0.0983598	0.113515	1.7989	0.700869	1.18861	0.223373	1.41993	4.39879	1.85667	3.31651	2.29278	4.04857	0.283291	1.877	5.20993	0.506188	2.17124	0.134772	0.0901432	1.32111	0.490467	0.550539	0.736233	4.20141	0.0896018	0.0816327	5.28255	0.114582	0.784378	0.882408	0.658908	0.101088	0.130974	0.0820883	0.0891805	7.46633	1.06074	0.0671181	0.449078	1.43554	1.12696	0.0933877	0.79223	0.985821	1.1517	1.02385	0.940272	1.23908
U	0.936317	0.674167	0.684942	0.69327	0.598766	1.1265	0.566132	0.767473	0.638114	0.619259	0.653236	0.786831	0.732954	0.510033	0.766306	0.942249	0.603567	0.944353	0.572547	0.46009	0.265943	1.09982	0.292075	0.846763	1.68229	0.766354	0.664959	0.0715872	0.466069	0.754551	0.53268	0.526173	0.425202	0.644703	0.516616	0.517029	0.974889	1.75216	0.447739	0.642843	0.481248	0.35009	0.825513	0.407808	0.694658	0.602525	0.504082	0.544657	0.561444
W	0.232189	0.196828	0.134968	0.248871	0.223813	0.116716	0.571409	0.511193	0.177131	0.626533	0.462417	0.623602	0.198707	0.302137	0.200826	0.333088	0.140312	0.443773	0.352885	0.509565	0.0811587	0.404677	0.272836	0.251367	0.531112	0.334667	0.0923721	1.11911	0.259838	0.485562	0.219621	0.145238	0.504767	0.524677	0.364958	0.387841	0.495096	0.376434	0.447141	0.269425	0.104679	0.12147	0.914768	0.140687	0.413531	0.13627	0.168039	0.103768	0.17804
Mo	2.48641	3.13006	0.312814	1.81271	1.11575	0.405653	1.80988	4.15008	1.32901	3.24771	2.59971	2.33684	3.34987	1.87098	0.733443	1.06777	1.3338	2.11811	1.91324	2.69348	0.489723	3.07662	1.12939	1.68404	2.86778	3.38156	0.637084	0.116357	1.42526	2.43044	1.30763	0.498073	3.36719	4.01755	3.82071	3.53334	2.76308	1.73117	3.00783	1.31911	0.5988	0.547984	4.25235	0.676656	2.93555	0.724163	0.584791	0.652013	0.470715
Nd	6.66901	5.67241	5.70197	6.39669	6.21957	5.70645	5.16506	5.41295	5.77621	5.5552	5.63367	6.11626	5.61184	4.9193	6.15616	6.17022	5.5032	7.01163	4.20663	4.66663	2.28544	5.66515	3.30886	5.67299	7.18397	8.90898	5.38992	0.838466	3.94349	5.91298	5.89924	4.98094	4.69833	5.95573	5.47427	6.02664	7.68125	12.1363	4.2551	5.31678	4.66532	3.79121	5.99706	3.8132	4.79054	5.2381	4.57987	4.82435	5.16212
Sm	1.30129	1.21806	1.00114	1.11817	1.15241	1.2531	1.03285	0.937151	0.994266	1.03086	0.987791	1.06984	1.01443	0.846742	1.20569	1.27111	1.10342	1.38992	0.761376	0.974822	0.442288	1.19095	0.621961	1.37044	1.45161	1.80951	1.11613	0.154027	0.648421	1.23648	1.11107	1.07651	0.814181	1.23632	0.945481	1.05158	1.50032	2.36833	1.03443	1.0132	0.975347	0.739792	1.06831	0.779156	0.859498	1.20941	0.967371	1.04208	1.06304
Eu	0.39951	0.263755	0.252507	0.281318	0.244746	0.246094	0.268148	0.192745	0.218735	0.231354	0.229851	0.285393	0.242089	0.167764	0.227368	0.292107	0.241527	0.315622	0.199021	0.201345	0.131435	0.284022	0.206773	0.34025	0.340224	0.32168	0.272966	0.031252	0.150239	0.266333	0.213721	0.194173	0.226122	0.243703	0.229834	0.211128	0.314671	0.474618	0.196417	0.242199	0.206759	0.191154	0.224941	0.18009	0.223754	0.199401	0.171089	0.242116	0.223466
Gd	1.2637	0.826674	0.757447	0.864407	0.779163	0.914874	0.846505	0.909848	0.82006	0.870812	0.870728	1.14982	0.978238	0.584108	1.04081	1.23329	0.838193	1.22456	0.904583	0.785107	0.485924	0.972258	0.593187	1.25196	1.27299	1.23883	0.958593	0.165775	0.634766	1.09663	0.91457	0.767038	0.870019	1.03908	0.889778	1.06573	1.39083	2.07296	0.776384	0.78299	0.767469	0.511839	0.974467	0.55402	0.946895	0.972106	0.871099	0.963189	0.86397
Tb	0.200815	0.132331	0.126655	0.143422	0.146745	0.146781	0.136354	0.131416	0.120596	0.114898	0.135667	0.152451	0.147598	0.0875319	0.138296	0.140882	0.122602	0.197415	0.0916783	0.104396	0.0784086	0.146875	0.101106	0.195915	0.226048	0.17185	0.156204	0.0232883	0.0940903	0.157258	0.122508	0.105517	0.0959098	0.146368	0.134831	0.147515	0.195495	0.330916	0.109092	0.128611	0.113421	0.10111	0.153038	0.107177	0.128242	0.155114	0.123735	0.115769	0.143402
Dy	1.19108	0.857012	0.69513	0.697932	0.767995	0.936681	0.943761	0.902442	0.698855	0.860581	0.856654	0.894319	0.765855	0.737084	0.804821	1.08923	0.786349	0.97872	0.652185	0.800371	0.418143	1.02791	0.582179	1.10504	1.24759	1.14836	0.914849	0.114839	0.604498	0.994054	0.833876	0.664851	0.718515	0.988378	0.881428	0.92884	1.29585	2.08446	0.766906	0.66513	0.70783	0.661583	1.02679	0.599211	0.808675	0.877557	0.871586	0.743416	0.814273
Ho	0.23345	0.183415	0.154026	0.15203	0.167174	0.182298	0.184303	0.165415	0.155212	0.159031	0.149788	0.158248	0.169767	0.111615	0.159228	0.314399	0.159057	0.212226	0.152485	0.158785	0.0780716	0.1982	0.148605	0.423437	0.238147	0.255642	0.186528	0.0269304	0.118352	0.199443	0.155204	0.112643	0.195808	0.181553	0.188157	0.202861	0.244192	0.387933	0.130784	0.128455	0.154941	0.0964365	0.249678	0.111714	0.162267	0.194508	0.146628	0.160494	0.174253
Er	0.76257	0.48153	0.515416	0.452993	0.488871	0.564915	0.531061	0.459359	0.4294	0.497378	0.533279	0.46507	0.587628	0.506019	0.501014	0.676548	0.552496	0.588466	0.460232	0.458227	0.253743	0.557534	0.362732	0.581223	0.768179	0.66488	0.53721	0.0671673	0.375332	0.523423	0.435605	0.443337	0.410361	0.647808	0.612184	0.581889	0.606859	1.14587	0.428492	0.380675	0.425448	0.309622	0.67526	0.386461	0.499291	0.48316	0.559194	0.404417	0.557445
Tm	0.0963391	0.0639726	0.0747329	0.0670307	0.0840994	0.074324	0.0668005	0.0776401	0.0593664	0.0892946	0.0732107	0.0743736	0.0871657	0.0575911	0.0727727	0.0978082	0.0788391	0.0887625	0.0457067	0.0819002	0.0263472	0.090383	0.0521873	0.216185	0.112806	0.0889283	0.0855973	0.0112414	0.0538496	0.0771663	0.0694012	0.0752425	0.070644	0.101253	0.0696133	0.0774401	0.127178	0.14944	0.053186	0.0503323	0.0629521	0.070767	0.0903397	0.074617	0.0661735	0.100332	0.0731563	0.055123	0.0827125
Yb	0.632159	0.357091	0.424028	0.440833	0.516638	0.586503	0.49224	0.463164	0.464687	0.473221	0.494751	0.492224	0.688695	0.402404	0.569316	0.625025	0.56386	0.600245	0.438163	0.461748	0.222811	0.538988	0.345977	0.61544	0.789066	0.661522	0.673394	0.0668153	0.391825	0.615541	0.374726	0.388312	0.449948	0.568872	0.570271	0.662646	0.810053	0.997604	0.510455	0.394677	0.444783	0.316707	0.936233	0.411788	0.494204	0.633537	0.667126	0.439422	0.532997
Lu	0.0922963	0.0815684	0.0596635	0.0702414	0.0715267	0.0826013	0.0967119	0.079812	0.0634601	0.0626518	0.0597332	0.080364	0.0828047	0.0622433	0.107237	0.0731149	0.0764743	0.0946727	0.0774199	0.0785489	0.0306825	0.0877962	0.0691744	0.105608	0.126105	0.094078	0.108006	0.0125508	0.0473753	0.0845138	0.0654291	0.0757708	0.0678591	0.118811	0.0995523	0.0975561	0.111662	0.13782	0.0754469	0.0525643	0.0760767	0.0555322	0.134206	0.0961341	0.0704966	0.099215	0.0985007	0.0711096	0.0901375
Hf	1.61884	1.77885	2.13356	1.8962	2.15962	2.3165	1.85162	2.55677	2.68166	2.5654	2.39075	2.99408	2.64409	2.42876	3.65998	2.69736	3.4233	2.83301	1.38495	1.4994	0.368109	1.62908	0.99086	2.14477	4.05984	3.17123	1.79594	0.282679	2.06698	2.96649	2.12675	2.08471	2.3223	5.05951	4.55971	5.41197	3.18471	2.40908	2.19281	1.30668	1.98914	1.95717	6.68273	2.69249	2.86223	4.68386	3.55907	1.99839	2.54807
Th	1.30974	1.47751	1.54893	1.58656	1.51208	1.85648	1.34613	1.49974	1.64721	1.48285	1.42314	1.61827	1.7608	1.40611	1.70126	3.45553	1.85582	1.93271	1.17732	1.23368	0.585574	1.18657	0.809203	1.76564	3.00888	2.26153	1.62016	0.258163	1.26036	1.75881	1.39742	1.37421	1.35233	2.3905	1.72995	2.05446	2.60429	5.60658	1.3357	1.37896	1.41346	1.08416	2.68738	1.45809	1.49805	2.1766	1.81916	1.79802	1.7099
[truncated: 3 more columns]

## Sheet: TABLE S3 Gadei
	Concentrations are in %w of oxides or in ppm of elements. <dl is for below the detection limit. nm is for not measured.
	PR0449	PR0450	PR0451	PR0452	PR0453	PR0454	PR0455	PR0456	PR0457	PR0458	PR0459	PR0460	PR0461	PR0462	PR0463	PR0464	PR0465	PR0466	PR0467	PR0468
	GAD 03	GAD 09	GAD 19	GAD 04	GAD 07	GAD 30	GAD 31	GAD 33	GAD 35	GAD 05	GAD 08	GAD 25	GAD 12	GAD 17	GAD 10	GAD 13	GAD 18	GAD 24	GAD 22	GAD 26
SiO2	0.69154	0.603894	0.60427	0.799234	0.725831	0.683322	0.672539	0.703567	0.832509	0.604409	0.638564	0.770506	0.617834	0.653821	0.533877	0.44963	0.595468	0.732376	0.801922	0.692313
Na2O	0.132315	0.125215	0.147746	0.0226222	0.0842192	0.118563	0.0353401	0.102419	0.00904967	0.0291052	0.0317449	0.0678741	0.0720263	0.0600249	0.0806244	0.16212	0.12505	0.0911766	0.0191492	0.0700052
MgO	0.00386576	0.0449771	0.0201041	0.0304535	0.0270475	0.0424333	0.023755	0.0424142	0.0382293	0.00336454	0.0011427	0.00998325	0.0158447	0.016812	0.0261464	0.0313597	0.0372627	0.00920068	0.0478787	0.0402301
Al2O3	0.0745164	0.0718732	0.0365699	0.032599	0.0523878	0.0201565	0.118239	0.0395241	0.018985	0.137334	0.139327	0.0315407	0.0368454	0.0419427	0.0366989	0.0329324	0.01589	0.0258004	0.0258703	0.0319521
P2O5	0.00132191	0.00363758	0.00480442	0.0040401	0.00415662	0.0018261	0.0143085	0.00394073	0.00226823	0.00302345	0.00116509	0.0024509	0.0044736	0.00399154	0.0150815	0.015666	0.00161894	0.00532506	0.00239049	0.00208022
K2O	0.0389524	0.044625	0.0235552	0.0263151	0.0288586	0.0355397	0.0565767	0.0263144	0.0273044	0.0366361	0.0418852	0.0103039	0.0249682	0.0263463	0.0285534	0.0430778	0.0223769	0.0263639	0.0302351	0.0370232
CaO	0.0141625	0.0424551	0.0632081	0.054326	0.0227313	0.0547897	0.0355447	0.0626416	0.0535598	0.169177	0.133109	0.079103	0.040099	0.0363466	0.0508857	0.0386064	0.0492397	0.0531259	0.0398605	0.0531937
MnO	0.00049136	0.0004221	0.0144591	0.00027702	0.00729899	0.00079698	0.000468543	0.00028452	0.00058785	0.00825854	0.00693945	0.00714965	0.0389419	0.0305979	0.00682981	0.0353254	0.0031391	0.00770252	0.0133649	0.00409126
Fe2O3	0.0120225	0.0121167	0.0143445	0.00868518	0.0133486	0.00589329	0.0332564	0.00911342	0.00466544	0.00494452	0.00306167	0.0122965	0.0241194	0.0238073	0.00919395	0.0113098	0.00461278	0.00828123	0.00671403	0.00825586
CuO	0.0025628	0.00374148	0.0152144	0.0140808	0.000747004	0.00567853	0.00337237	0.00549186	0.00822006	6.1823e-05	0.000289551	0.00115551	0.00183332	0.00195442	0.00024951	0.00242814	8.78204e-05	0.000800195	7.67906e-05	3.24759e-05
SnO2	0.00301552	0.00790832	0.00224578	0.000358003	0.0133443	0.00366627	0.000187715	0.000116177	0.000108637	5.27033e-06	9.18058e-06	0.000122518	0.00210298	<dl	0.0393989	0.0115729	0.013382	0.0033029	<dl	0.0560698
PbO	0.0206917	0.0351308	0.0446311	0.000957454	0.0173149	0.02358	0.000365441	0.000654293	0.000408234	0.000245889	0.000149015	0.00355291	0.116508	0.0979853	0.169068	0.161902	0.129626	0.0330878	0.00236378	0.00117303
Li	12.1487	13.64	56.0836	9.96516	12.7154	20.7851	20.577	16.6551	4.29733	79.5308	78.8664	6.94077	17.895	16.1346	12.8165	69.0801	18.2872	29.046	8.00222	13.9012
Be	nm	nm	nm	nm	nm	nm	nm	nm	nm	nm	nm	nm	nm	nm	nm	nm	nm	nm	nm	nm
B	nm	nm	nm	nm	nm	nm	nm	nm	nm	nm	nm	nm	nm	nm	nm	nm	nm	nm	nm	nm
Sc	nm	nm	nm	nm	nm	nm	nm	nm	nm	nm	nm	nm	nm	nm	nm	nm	nm	nm	nm	nm
Ti	1301.37	1055.91	856.249	778.595	716.208	504.544	2110.41	618.114	462.77	408.925	182.575	648.576	1088.26	1092.58	927.395	905.714	555.886	1196.48	702.146	1155.59
V	96.5158	21.0845	27.4703	16.4519	14.3513	14.5642	35.5381	13.8024	10.6599	17.3762	12.5476	21.6782	73.8831	65.9686	30.1415	18.1088	11.6904	14.4965	17.6138	22.2103
Cr	11.1727	25.8073	25.8758	45.7375	42.7887	39.792	75.6019	30.8498	39.8946	10.3311	5.13136	27.6341	19.0918	25.8445	80.3048	18.0072	45.1551	16.7998	57.3719	66.5312
Ni	46.9511	48.4756	34.7399	47.7605	41.1598	27.7856	82.7295	35.6514	33.5062	249.639	202.57	116.895	41.4643	36.5642	29.6142	28.6325	27.3385	0.821329	<dl	81.3163
Co	4.82108	5.29296	13.8262	3.72002	181.526	32.9217	6.87644	1.72238	1.96618	725.411	653.968	518.592	69.0836	49.2281	7.12545	18.322	4.39698	6.28394	10.4467	4.20894
Zn	86.6142	74.8755	0.00151807	42.0617	78.2822	241.323	204.145	67.8531	53.2621	157.191	111.506	53.2942	328.118	291.576	143.304	149.838	36.0029	142.296	40.6437	49.5505
As	44.8989	45.626	62.9402	56.775	55.0178	37.7566	25.3332	40.8695	51.0793	32.9546	15.5116	16.6705	54.5834	51.2028	39.9137	32.3794	70.9385	5.39149	3.8853	5.72034
Rb	102.112	58.0651	27.917	24.4788	35.0585	38.9448	149.812	25.3841	16.9715	71.763	158.568	13.9813	45.7566	43.5401	39.4234	57.4373	12.6282	52.3099	31.1609	69.3414
Sr	82.5469	228.742	280.56	307.949	165.55	413.639	180.839	332.04	416.016	304.389	209.758	379.562	429.379	356.278	395.1	349.39	383.262	378.93	394.385	368.898
Zr	374.289	122.468	164.473	186.43	139.836	137.881	186.235	149.193	185.653	78.6645	32.9508	115.569	203.258	218.028	174.337	165.213	97.87	128.566	179.206	208.718
Nb	5.1058	4.48984	4.46758	3.95551	3.39892	1.84789	8.22676	2.24863	1.78852	4.04457	2.44158	2.45643	4.37092	4.96334	4.014	3.06139	1.81349	4.22766	3.25192	3.56253
Ag	nm	nm	nm	nm	nm	nm	nm	nm	nm	nm	nm	nm	nm	nm	nm	nm	nm	nm	nm	nm
In	11.4802	35.2482	7.21465	1.28143	94.8086	11.1555	0.308577	0.43007	0.386186	<dl	<dl	1.15856	6.91364	6.75239	202.278	48.5402	53.1772	9.45124	12.6506	199.701
Sb	35.1266	26.6394	12.7141	54.4065	20.7585	32.5954	20.224	16.8156	81.7392	<dl	<dl	526.865	14.1585	15.3682	24.3681	6.17548	109.787	4.38928	2.89005	4.28704
Cs	1.45257	1.07528	0.773445	0.518774	0.952658	0.764013	1.39514	0.264103	0.490478	6.32905	2.25431	0.37729	1.20756	0.442308	0.548559	0.66079	0.264604	2.09059	0.233141	2.77987
Ba	225.096	306.377	578.648	104.362	127.147	94.0349	181.223	98.7192	79.8657	366.565	207.237	247.156	305.319	213.576	181.149	502.771	133.588	160.318	245.761	166.465
La	22.0673	7.51211	13.0375	10.9484	8.6888	7.91286	28.3656	8.10898	6.77027	8.92755	8.3051	8.5609	16.3504	15.6833	15.2521	19.6437	7.8583	11.2165	14.2329	11.5942
Ce	46.3286	14.0182	20.8645	16.8023	14.6125	13.2774	46.5675	13.8961	12.0889	19.505	41.5581	13.7577	23.7487	22.9643	22.6229	32.1212	14.4919	18.7496	23.6496	19.8769
Pr	4.34069	1.61494	2.49504	1.85419	1.63203	1.63203	5.26462	1.58931	1.32442	2.3156	1.50386	1.74311	2.94718	2.90062	2.87964	4.19727	1.53343	2.29079	2.17147	2.4509
Ta	nm	nm	nm	nm	nm	nm	nm	nm	nm	nm	nm	nm	nm	nm	nm	nm	nm	nm	nm	nm
Au	nm	nm	nm	nm	nm	nm	nm	nm	nm	nm	nm	nm	nm	nm	nm	nm	nm	nm	nm	nm
Y	10.1816	5.60658	7.74055	6.36253	6.6775	4.68528	18.1206	5.33098	4.18131	6.26016	3.39387	7.57519	11.0704	10.3347	7.62867	11.4111	3.82665	6.33968	6.38426	7.11758
Bi	nm	nm	nm	nm	nm	nm	nm	nm	nm	nm	nm	nm	nm	nm	nm	nm	nm	nm	nm	nm
U	80.7463	0.542718	0.924317	0.958237	0.881917	0.686878	3.26454	1.08544	0.703838	0.678398	1.06848	1.06848	0.910567	0.918039	2.20994	1.92876	0.780292	0.6342	0.818527	1.13364
W	nm	nm	nm	nm	nm	nm	nm	nm	nm	nm	nm	nm	nm	nm	nm	nm	nm	nm	nm	nm
Mo	0.674894	0.532417	3.72692	0.847368	2.07718	0.614904	2.91591	0.532417	0.622403	6.62146	4.09436	6.4115	2.42937	2.95025	3.49668	2.24537	2.02115	0.658016	5.21815	2.18588
Nd	14.2406	5.95857	10.4854	6.43869	7.65612	5.67565	23.9965	6.44726	4.74114	9.83379	5.83854	7.24459	12.1957	11.3939	12.8616	15.9448	6.06144	9.227	9.66601	9.24491
Sm	2.56119	1.05207	1.81957	1.25041	1.15555	1.10381	5.48307	1.22454	0.784742	2.01791	0.845107	1.44013	2.9415	2.31244	2.95071	2.82171	1.4634	1.84018	2.17919	2.17436
Eu	0.336807	0.207266	0.457712	0.0604526	<dl	0.0863608	1.21945	<dl	<dl	<dl	<dl	0.267719	0.516651	0.459251	0.543909	0.651343	0.254418	0.36751	0.305433	0.527711
Gd	1.37946	0.676717	1.40549	0.338359	<dl	<dl	3.81658	<dl	<dl	<dl	<dl	0.364386	2.16762	1.93494	2.37762	2.29166	1.0002	1.30767	1.32927	1.1059
Tb	0.243263	0.182447	0.243263	0.191135	0.156383	0.156383	0.557824	0.182447	0.112943	0.173759	0.0955675	0.208511	0.246224	0.251946	0.291224	0.332508	0.138955	0.176464	0.208122	0.230934
Dy	1.24598	1.12399	1.40282	1.21113	1.21113	0.827748	3.56153	1.17627	0.766756	1.33311	0.688338	1.18499	1.94288	1.48646	1.51968	2.33503	0.810475	1.06432	1.2633	1.29794
Ho	0.235702	0.235702	0.261891	0.244431	0.174594	0.157134	0.706073	0.27935	0.148405	0.27062	0.139675	0.253161	0.391205	0.351921	0.43333	0.497861	0.167605	0.193053	0.32927	0.2826
Er	0.603416	0.655887	0.664632	0.647142	0.550945	0.446003	1.63104	0.708358	0.472239	0.655887	0.507219	0.655887	1.1571	0.862617	1.01615	1.35444	0.414438	0.597015	0.793627	0.916646
Tm	0.0612922	0.0788042	0.0963163	0.0875603	0.0700482	0.0612922	0.277604	0.0700482	0.0437801	0.0875603	0.0437801	0.105072	0.172315	0.124213	0.178997	0.16039	0.0573791	0.109003	0.11331	0.118779
Yb	0.71134	0.781596	0.658648	0.676212	0.676212	0.500572	1.7266	0.860633	0.447881	0.720122	0.553264	0.605956	1.01956	0.972804	0.972844	1.06861	0.408977	0.615697	0.681954	0.840241
Lu	0.0967317	0.0879379	0.123113	0.105525	0.105525	0.0615565	0.218347	0.131907	0.0439689	0.0351752	0.0703503	0.0967317	0.171872	0.159502	0.124548	0.179221	0.0558582	0.111395	0.108201	0.134755
Hf	4.21443	1.95034	2.45912	3.01031	1.7977	1.95882	4.34212	3.01879	2.56088	1.07693	0.568142	1.35676	4.36036	4.22925	3.64958	4.84423	2.06087	2.41029	3.81702	4.8123
Th	19.5447	2.15308	2.85612	2.53096	2.10913	1.71367	5.16205	3.22522	1.64337	1.07214	0.623952	1.30063	3.05361	2.85338	2.64032	3.01488	1.42303	2.25987	2.26995	2.48585
